# Supplementary material for: The incremental value of the contribution of a biostatistician to the reporting quality in health research—A retrospective, single center, observational cohort study
Source: PLOS journal article supplement (doi:10.1371/journal.pone.0264819), 2022-03-04
Supplement: S2 (10.1371/journal.pone.0264819.s002) [file journal.pone.0264819.s002]

Tabelle1

| Affiliation                                                             | Frequency | Affiliation excluded |
|-------------------------------------------------------------------------|-----------|----------------------|
| university of zurich                                                    | 3672      |                      |
| university hospital zurich                                              | 1409      |                      |
| university children's hospital zurich                                   | 250       |                      |
| university hospital of zurich                                           | 208       |                      |
| university hospital zurich and university of zurich                     | 98        |                      |
| zurich university of applied sciences                                   | 97        | x                    |
| university of zurich and eth zurich                                     | 86        |                      |
| university hospital and university of zurich                            | 60        |                      |
| university and eth zurich                                               | 54        |                      |
| university hospital of psychiatry zurich                                | 38        |                      |
| vetsuisse faculty university of zurich                                  | 32        | x                    |
| zurich university hospital                                              | 30        |                      |
| university and university hospital zurich                               | 29        |                      |
| eth zurich and university of zurich                                     | 24        |                      |
| university heart center zurich                                          | 24        |                      |
| zurich university of applied sciences (zhaw)                            | 24        | x                    |
| university children's hospital of zurich                                | 22        |                      |
| university of zurich-vetsuisse                                          | 20        | x                    |
| university of zurich and university hospital zurich                     | 19        |                      |
| psychiatric hospital of the university of zurich                        | 18        |                      |
| university and university hospital of zurich                            | 18        |                      |
| university zurich                                                       | 18        |                      |
| university of zurich &                                                  | 15        |                      |
| university hospital zurich (usz)                                        | 12        |                      |
| university of zurich and university hospital of zurich                  | 11        |                      |
| 1 university of zurich                                                  | 10        |                      |
| zhaw zurich university of applied sciences                              | 10        | x                    |
| 2 university of zurich                                                  | 9         |                      |
| eth and university of zurich                                            | 9         |                      |
| university hospital for psychiatry zurich                               | 9         |                      |
| zurich university                                                       | 9         |                      |
| zurich university of applied sciences zhaw                              | 8         | x                    |
| university hospital zurich and city hospital waid                       | 7         |                      |
| university hospital zurich and clinical neuroscience center             | 7         |                      |
| university hospital zurich (usz) and zurich university                  | 6         |                      |
| zurich university hospital and university of zurich                     | 6         |                      |
| university of zurich and department of health sciences and technology   | 5         |                      |
| children's university hospital zurich                                   | 4         |                      |
| department of chemistry university of zurich winterthurerstrasse 190    | 4         | x                    |
| psychiatric university hospital zurich                                  | 4         |                      |
| university hospital of zurich and university of zurich                  | 4         |                      |
| university hospital zurich &                                            | 4         |                      |
| university of zurich (uzh)                                              | 4         |                      |
| university of zurich and city hospital waid                             | 4         |                      |
| university of zurich and swiss federal institute of technology zurich   | 4         |                      |
| university of zurich centre for travel medicine                         | 4         |                      |
| vetsuisse faculty of the university of zurich                           | 4         | x                    |
| 1 university hospital zurich                                            | 3         |                      |
| associated institute of the university of zurich                        | 3         |                      |
| o university of zurich                                                  | 3         |                      |
| universitatsspital zurich                                               | 3         |                      |
| university children's hospital zurich and children's research center    | 3         |                      |
| university clinic of zurich                                             | 3         |                      |
| university heart centre zurich                                          | 3         |                      |
| university of zuerich                                                   | 3         |                      |
| university of zurich and zurich center for integrative human physiology | 3         |                      |
| university of zurich hospital                                           | 3         |                      |
| university of zurich uzh                                                | 3         |                      |

Tabelle1

|                                                                                   |   |   |
|-----------------------------------------------------------------------------------|---|---|
| zurich university of applied science                                              | 3 | x |
| 2 university zurich                                                               | 2 |   |
| a swiss research institute for public health and addiction at zurich university   | 2 |   |
| a universitatsspital zurich                                                       | 2 |   |
| and university hospital zurich                                                    | 2 |   |
| and university of zurich                                                          | 2 |   |
| balgrist university hospital zurich                                               | 2 |   |
| clinical neuroscience center university hospital zurich zurich switzerland        | 2 |   |
| cteph programme university hospital zurich                                        | 2 |   |
| department of dermatology university hospital zurich                              | 2 |   |
| division of infectious diseases and hospital epidemiology and                     |   |   |
| children's research center university children's hospital zurich                  | 2 |   |
| division of internal medicine university of zurich zurich switzerland             | 2 |   |
| eth university of zurich                                                          | 2 |   |
| eth zurich and university of basel                                                | 2 | x |
| ethz and university of zurich                                                     | 2 |   |
| heart center university hospital of zurich                                        | 2 |   |
| institute of molecular cancer research of the university of zurich and eth zurich | 2 |   |
| medical faculty of the university of zurich and department of health science      |   |   |
| and technology of the swiss federal institute of technology                       | 2 |   |
| swiss federal institute of technology (ibz) eth zurich universitätstrasse         | 2 | x |
| swiss research institute for public health and addiction associated               |   |   |
| with the university of zurich                                                     | 2 |   |
| swiss research institute for public health and addiction at zurich university     | 2 |   |
| switzerland and university of zurich                                              | 2 |   |
| the university of zurich                                                          | 2 |   |
| universitaetstrasse 2 - 8092 zurich                                               | 2 | x |
| universitats-kinderspital zurich                                                  | 2 |   |
| universitatsspital zurich klinik fur neuroradiologie                              | 2 |   |
| universities of bern and zurich                                                   | 2 |   |
| universities of berne and zurich                                                  | 2 |   |
| university and eth zurich                                                         | 2 |   |
| university children's hospital zurich and children's research centre              | 2 |   |
| university hospital and university of zurich (e.s                                 | 2 |   |
| university hospital and university zurich                                         | 2 |   |
| university hospital zuerich                                                       | 2 |   |
| university hospital zurich usz                                                    | 2 |   |
| university of applied sciences zurich                                             | 2 | x |
| university of arts zurich                                                         | 2 | x |
| university of zurich (r.g                                                         | 2 |   |
| university of zurich (uzh) and swiss federal institute of technology (eth)        | 2 |   |
| university of zurich and eth zurich . zurich                                      | 2 |   |
| university of zurich and eth zurich institute for biomedical engineering          | 2 |   |
| university of zurich and eth zurich zurich                                        | 2 |   |
| university of zurich and federal institute of technology (eth) zurich             | 2 |   |
| university of zurich and swiss federal institute of technology (eth zurich)       | 2 |   |
| university of zurich and swiss federal institute of technology in zurich          | 2 |   |
| university of zurich and university research priority program "                   | 2 |   |
| university of zurich zurich                                                       | 2 |   |
| university of zurich(switzerland)                                                 | 2 |   |
| university zurich-irchel                                                          | 2 |   |
| university zurich and university hospital zurich                                  | 2 |   |
| universityhospital zurich                                                         | 2 |   |
| zuerich university of applied sciences (zhaw)                                     | 2 | x |
| zurich university hospital of psychiatry                                          | 2 |   |
| zurich university of the arts                                                     | 2 | x |
| 1 zurich university of applied sciences                                           | 1 | x |
| 2 institute of diagnostic and interventional radiology university hospital zurich | 1 |   |
| a institute of occupational therapy at zurich university of applied sciences      | 1 | x |

## Tabelle1

|                                                                                                                      |   |   |
|----------------------------------------------------------------------------------------------------------------------|---|---|
| a university of zurich                                                                                               | 1 |   |
| §university of zurich                                                                                                | 1 |   |
| and zurich university                                                                                                | 1 |   |
| assistant professor of orthopaedics university of zurich                                                             | 1 |   |
| associated with the university of zurich                                                                             | 1 |   |
| center for dental and oral medicine university of zurich                                                             | 1 |   |
| center for dermatology and hair diseases professor trüeb and university of zurich                                    | 1 |   |
| clinic for geriatric medicine and centre on aging and mobility at the university of zurich                           | 1 |   |
| clinical research priority program for rare diseases university of zurich                                            | 1 |   |
| clinical research priority program for rare diseases university of zurich"                                           | 1 |   |
| department of evolutionary biology and environmental studiesuniversity of zurich                                     | 1 |   |
| department of neurology university hospital zurich and university of zurich zurich switzerland                       | 1 |   |
| department of neuroradiology university hospital zurich university of zurich zurich switzerland                      | 1 |   |
| department of neurosurgery university hospital zurich university of zurich zurich switzerland                        | 1 |   |
| division neuropsychology department of psychology university of zurich zurich switzerland                            | 1 |   |
| division of stem cell transplantation university children's hospital zurich                                          | 1 |   |
| eidgenössische technische hochschule and university of zurich                                                        | 1 |   |
| eth and university zurich                                                                                            | 1 |   |
| from the psychiatric university hospital zurich (p.b.)                                                               | 1 |   |
| institute of clinical chemistry university of zurich and university hospital of zurich                               | 1 |   |
| institute university of zurich                                                                                       | 1 |   |
| neuropsychology unit department of neurology university hospital zurich zurich switzerland                           | 1 |   |
| physics department of the university of zurich                                                                       | 1 | x |
| swiss federal institute of technology (eth) and university of zurich                                                 | 1 |   |
| universitätsspital zurich                                                                                            | 1 |   |
| universitätsstrasse 16 eth zurich                                                                                    | 1 | x |
| universitätsstrasse 8092 zurich                                                                                      | 1 | x |
| universitaetsspital zuerich                                                                                          | 1 |   |
| university and balgrist hospital zurich                                                                              | 1 |   |
| university and eth zuerich                                                                                           | 1 |   |
| university and eth zurich gloriastrasse 35                                                                           | 1 |   |
| university children's hospital zurich - eleonore foundation                                                          | 1 |   |
| university children's hospital zurich and children's research center zurich                                          | 1 |   |
| university children's hospital zurich cddivision of clinical pathology                                               | 1 |   |
| university heart center zurich. susanne.markendorf@usz.ch                                                            | 1 |   |
| university hospital balgrist and university hospital of zurich                                                       | 1 |   |
| university hospital of zurich and center for molecular cardiology                                                    | 1 |   |
| university hospital of zurich einstitute of medical virology                                                         | 1 |   |
| university hospital zurich #medical practice hottingen                                                               | 1 |   |
| university hospital zurich (bbs                                                                                      | 1 |   |
| university hospital zurich [usz] and university of zurich                                                            | 1 |   |
| university hospital zurich † division of gastroenterology and hepatology                                             | 1 |   |
| university hospital zurich and university of zurich ddepartment of medicine                                          | 1 |   |
| university hospital zurich and university zurich                                                                     | 1 |   |
| university hospital zurich bcenter of competence multimorbidity cuniversity research priority program "              | 1 |   |
| university hospital zurich binstitute of medical virology                                                            | 1 |   |
| university hospital zurich buniversity of zurich chorten centre for patient oriented research and knowledge transfer | 1 |   |
| university hospital zurich ccenter for microscopy and image analysis                                                 | 1 |   |
| university hospital zurich dinstitute of medical microbiology eswiss national center for mycobacteria                | 1 |   |
| university hospital zurich duniversity of zurich                                                                     | 1 |   |

Tabelle1

|                                                                                  |   |   |
|----------------------------------------------------------------------------------|---|---|
| university hospital zurich edivision of gerontopsychology and gerontology        | 1 |   |
| university hospital zurich                                                       | 1 |   |
| university of applied sciences of special needs education zurich                 | 1 | x |
| university of zurich-irchel                                                      | 1 |   |
| university of zurich - vetsuisse                                                 | 1 | x |
| university of zurich and eidgenössische technische hochschule (eth) zurich       | 1 |   |
| university of zurich and eth                                                     | 1 |   |
| university of zurich and federal institute of technology                         | 1 |   |
| university of zurich and the eth zurich                                          | 1 |   |
| university of zurich bdepartment of nephrology                                   | 1 |   |
| university of zurich bnational center of competence in research                  | 1 |   |
| university of zurich ccancer registry zurich and zug                             | 1 |   |
| university of zurich cdepartment of gastroenterology                             | 1 |   |
| university of zurich ddepartment of dermatology                                  | 1 |   |
| university of zurich dental school                                               | 1 |   |
| university of zurich departments of §psychiatry **neurology                      | 1 |   |
| university of zurich fdepartment of pulmonology                                  | 1 |   |
| university of zurichjinstitute of medical virology                               | 1 |   |
| zhaw (zurich university of applied sciences) school of social work               | 1 | x |
| zurich center for integrative human physiology (zihp) university of zurichzurich | 1 |   |
| zurich university ‡zurich center for integrative human physiology (zihp)         | 1 |   |
| zurich university children's hospital                                            | 1 |   |
| zurich university for applied sciences                                           | 1 | x |
| zurich university for applied sciences (zhaw)                                    | 1 | x |
| zurich university hospital for psychiatry                                        | 1 |   |
| zurich university of applied sciences (zuas)                                     | 1 | x |
| zurich university of teacher education                                           | 1 | x |
